# Supplementary material
Source: PubMed Central journal article supplement (PMC1383521)

#### **Supplementary information 4**

Finally, to visualize undoubtedly the murine APP-CTFs, brain homogenates from wildtype and seladin-1 deficient mice and a SwAPP control were run on a large scale (30cm) SDS-PAGE. After blotting the membrane was cut in half, the seladin-1 deficient and wildtype lanes were probed with the APP C-terminal antibody, whereas the SwAPP lane was stained with the 6E10. The 6E10 antibody recognizes only human  $\beta$ -CTF (amino acid 1-17 of the A $\beta$  peptide) but not  $\alpha$ -CTF and therefore serves as a positive control for the exact size of the  $\beta$ -CTF in seladin-1 heterozygous and wildtype mouse brain samples on the same gel (Suppl. Figure 4A).

#### **Supplementary Figure legend 4**

Western blot analysis of  $\beta$ -CTFs in mouse brains. 40 $\mu$ g of SwAPP brain sample and 150 $\mu$ g total brain extracts of seladin-1 heterozygous (+/-) and wildtype (++) were loaded on a 30cm 10% tricine gel. Probing lane 1 with the 6E10 antibody revealed  $\beta$ -CTF. Lanes 2 and 3 were stained with the anti APP C-terminal antibody to visualize  $\alpha$ - and  $\beta$ -CTF (A). \*,\*\* represent unspecific staining normally observed with the anti APP C-terminal antibody.

Seladin-1 knock-out mice (15 days of age) exhibited a severe growth retardation and immature phenotype. They were about half of the size of their wildtype littermates (B).

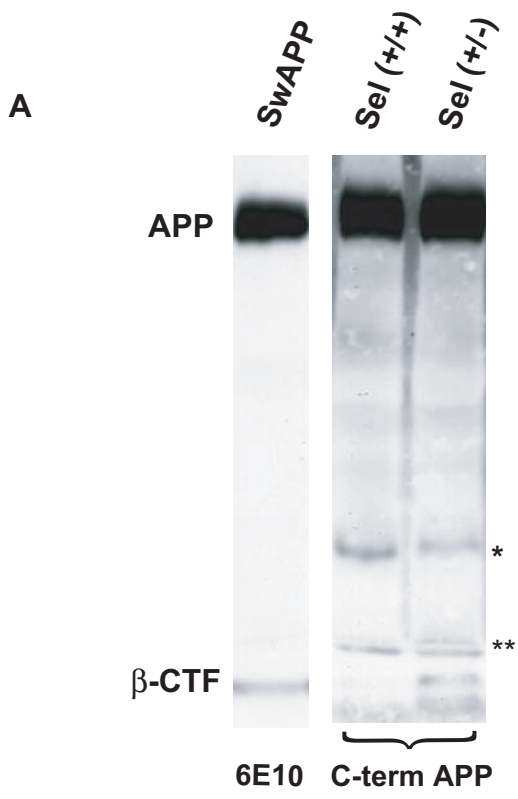

**B**

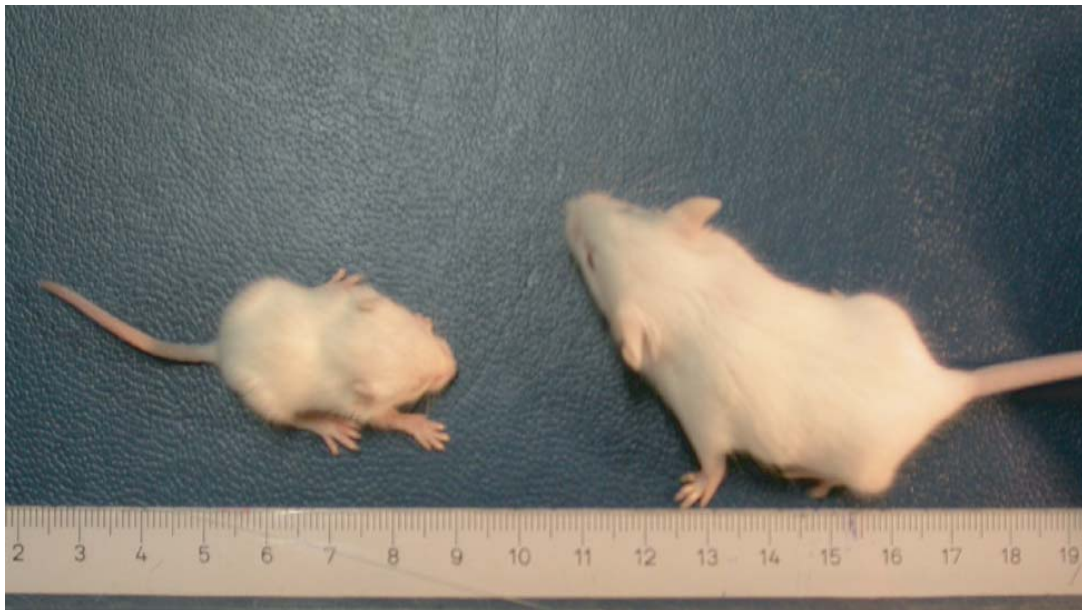

Supplement: 7600938s4.pdf [file 7600938s4.pdf]
